# Supplementary material for: Relationship between employee engagement scores and service quality ratings: analysis of the National Health Service staff survey across 97 acute NHS Trusts in England and concurrent Care Quality Commission outcomes (2012–2016)
Source: PubMed Central journal article supplement — BMJ Open. 2019 Jul 17;9(7):e026472. doi: 10.1136/bmjopen-2018-026472 (PMC6661626; doi:10.1136/bmjopen-2018-026472), 2019-07-17
Supplement: bmjopen-2018-026472supp001.pdf [file bmjopen-2018-026472supp001.pdf]

| Rating                                                 | Domain     | Definition                                                                                                                                                                                   |
|--------------------------------------------------------|------------|----------------------------------------------------------------------------------------------------------------------------------------------------------------------------------------------|
| Outstanding<br>Good<br>Needs improvement<br>Inadequate | Safe       | protecting people from abuse and avoidable harm and is rated across 3 areas; culture, staffing and environment                                                                               |
|                                                        | Effective  | treatment and support achieves good outcomes, promotes a good quality of life and is based on the best available evidence                                                                    |
|                                                        | Caring     | staff involve and treat people with compassion, kindness, dignity and respect                                                                                                                |
|                                                        | Responsive | services are organized so that they meet people's needs                                                                                                                                      |
|                                                        | Well-led   | leadership, management and governance of the organization assures the delivery of high-quality person-centered care, supports learning and innovation, and promotes an open and fair culture |
