# Supplementary material for: Relationship between employee engagement scores and service quality ratings: analysis of the National Health Service staff survey across 97 acute NHS Trusts in England and concurrent Care Quality Commission outcomes (2012–2016)
Source: PubMed Central journal article supplement — BMJ Open. 2019 Jul 17;9(7):e026472. doi: 10.1136/bmjopen-2018-026472 (PMC6661626; doi:10.1136/bmjopen-2018-026472), 2019-07-17
Supplement: bmjopen-2018-026472supp002.pdf [file bmjopen-2018-026472supp002.pdf]

|                     | Mean  | Std<br>Deviation | n  |
|---------------------|-------|------------------|----|
| CQC Rating          | 1.28  | .657             | 97 |
| Beds                | 837.5 | 361.149          | 97 |
| Teaching            | .30   | .462             | 96 |
| FT                  | .64   | .484             | 96 |
| Deficit %           | 4.235 | 4.28497          | 96 |
| Engagement<br>Score | 3.798 | .09571           | 97 |
