# Supplementary material for: Relationship between employee engagement scores and service quality ratings: analysis of the National Health Service staff survey across 97 acute NHS Trusts in England and concurrent Care Quality Commission outcomes (2012–2016)
Source: PubMed Central journal article supplement — BMJ Open. 2019 Jul 17;9(7):e026472. doi: 10.1136/bmjopen-2018-026472 (PMC6661626; doi:10.1136/bmjopen-2018-026472), 2019-07-17
Supplement: bmjopen-2018-026472supp003.pdf [file bmjopen-2018-026472supp003.pdf]

| CQC     | Sub- domain | Mean   | Std. Deviation | n  |
|---------|-------------|--------|----------------|----|
| inadeq  | Advocacy    | 3.5709 | .14822         | 8  |
|         | Motivation  | 3.8915 | .06785         | 8  |
|         | Involvement | .6636  | .02418         | 8  |
| reqim   | Advocacy    | 3.6987 | .14999         | 57 |
|         | Motivation  | 3.9188 | .07190         | 57 |
|         | Involvement | .6933  | .03892         | 57 |
| good    | Advocacy    | 3.8892 | .10011         | 29 |
|         | Motivation  | 3.9504 | .06329         | 29 |
|         | Involvement | .7124  | .02287         | 29 |
| outstnd | Advocacy    | 4.0748 | .10995         | 3  |
|         | Motivation  | 3.9675 | .02208         | 3  |
|         | Involvement | .7177  | .02065         | 3  |
| Total   | Advocacy    | 3.7567 | .17674         | 97 |
|         | Motivation  | 3.9275 | .06994         | 97 |
|         | Involvement | .6973  | .03568         | 97 |
